## Prognostic and predictive value of metastatic lymph node ratio in stage III gastric cancer after D2 nodal dissection

Yinbo Chen<sup>1,\*</sup>, Cong Li<sup>2,\*</sup>, Yian Du<sup>3</sup>, Qi Xu<sup>4</sup>, Jieer Ying<sup>4</sup> and Cong Luo<sup>4</sup>

<sup>1</sup>Department of Colorectal Surgery, Zhejiang Cancer Hospital, Hangzhou, Zhejiang 310022, P.R. China

<sup>2</sup>Department of Lymphoma Oncology, Zhejiang Cancer Hospital, Hangzhou, Zhejiang 310022, P.R. China

<sup>3</sup>Department of Abdominal Surgery, Zhejiang Cancer Hospital, Hangzhou, Zhejiang 310022, P.R. China

<sup>4</sup>Department of Abdominal Oncology, Zhejiang Cancer Hospital, Hangzhou, Zhejiang 310022, P.R. China

\*These authors have contributed equally to this work and so served both as the first author

**Correspondence to:** Cong Luo, **email:** CongLuo939291@gmail.com

Jieer Ying, **email:** yingje@zjcc.org.cn

**Keywords:** adjuvant chemotherapy, gastric cancer, lymph node ratio

**Received:** February 21, 2017

**Accepted:** July 18, 2017

**Published:** August 07, 2017

**Copyright:** Chen et al. This is an open-access article distributed under the terms of the Creative Commons Attribution License 3.0 (CC BY 3.0), which permits unrestricted use, distribution, and reproduction in any medium, provided the original author and source are credited.

### ABSTRACT

**Introduction:** This study is to evaluate the prognostic and predictive value of metastatic lymph node ratio (MLR) in stage III gastric cancer following radical D2 dissection.

**Methods:** 87 patients who underwent radical resection with D2 lymphadenectomy were retrospectively evaluated. The median age was 60 with a 2:1 ratio of male/female. Of these 87 patients, 83 underwent total gastrectomy, the remaining 4 underwent subtotal gastrectomy and 57 patients received adjuvant chemotherapy with fluoropyrimidines. Indexes of lymph node involvement and other clinicopathological data were analyzed. Survival was determined by the Kaplan-Meier method and log-rank test. Multivariate analysis was performed using the Cox proportional hazards model.

**Results:** Median total retrieved lymph node number was 35 (range: 10-104) with median metastatic lymph node amount of eight (range: 0-71). Median survival time was 31.7 months with a 3-year survival rate of 36.4%. Patients were divided into four groups according to MLR: MLR0, 0; MLR1, <0.1; MLR2, 0.1-0.25; MLR3, >0.25. After median follow-up of 31 months, median OS rates of MLR0 to MLR3 were 37.1m, 35.9m, 31.5m and 20.8m, respectively (p=0.013). Median OS rates were significantly different among subgroups: 39.3m and 36.5m were obtained for low subgroups (MLR<0.24) with or without adjuvant chemotherapy, respectively; 22.9m and 12.2m were found in high subgroups (MLR>0.24) with and without chemotherapy, respectively (p=0.002). Finally, MLR constituted an independent prognostic factor in multivariable analysis.

**Conclusions:** After R0 resection with D2 lymphadenectomy for stage III gastric cancer, MLR constitutes an effective prognostic indicator. Patients with high MLR may benefit the most from adjuvant chemotherapy.

## INTRODUCTION

Gastric cancer is a common malignancy, being the fourth most common diagnosed cancer worldwide and accounting for 738,000 deaths each year placing it second in cancer deaths following lung cancer [1]. Even though TNM staging classification has been proved to be a simple, reliable and objective method for predicting the prognosis of gastric cancer, it still has some problems such as heterogeneous survival. Lymph node metastasis is one of the most important prognostic factors for gastric cancer patients who undergo radical resection [2, 3]. Yet to date, there is still lacking the best classification of N stage to predict the prognosis of gastric cancer [4]. A new version of the Japanese Classification for gastric cancer and treatment guidelines (Japanese Gastric Cancer Association (JGCA)) redefined the N stage based on the level of lymph node involvement which was in accordance with the International Federation of cancer and the American Cancer Society (UICC/AJCC). Even in patients with D2 radical resection around the world, there still exists big difference in the number of lymph nodes examined [5]. With the increasing tested number of lymph nodes, the number of metastatic lymph nodes also increases. Lymph node ratio (MLR) is defined as number of metastatic lymph nodes divided by total resected lymph nodes, which is a supplement to N staging, especially in patients with lymph nodes examined less than 15. Two large-scale studies found AJCC staging misclassified 57% of patients while the MLR misclassified only 12%, suggesting MLR was superior over the present N staging system about the potential for stratification of gastric cancer patients [6, 7]. The application of MLR was showed to be a good prognostic factor in gastric cancer in the retrospective analyses [8-13]. However, few previous studies analyzed the prognostic value of MLR in stage III gastric cancer, neither did they evaluate the association between MLR and adjuvant chemotherapy. Considering the high incidence of stage III gastric cancer in Chinese patients and its heterogeneity in survival, thus, the aim of this study was to evaluate the prognostic significance of MLR, and to investigate whether MLR was an appropriate predicting factor for adjuvant chemotherapy in stage III gastric cancer after D2 dissection.

## RESULTS

### Clinicopathological characteristics of patients

A total of 87 patients were included in the present study. The median age of patients was 60 (range: 21 to 83) with 58 males (66.7%) and 29 females (33.3%). The surgical modalities were as following: 82 total gastrectomy (94.3%), five subtotal gastrectomy (5.7%). Of those 87 patients, 57(65.5%) received chemotherapy, including neoadjuvant chemotherapy in 19 patients. All chemotherapy regimens contained Fluoropyrimidines

(5-FU) or capecitabine. Only five patients received fluoropyrimidines single-agent, while 52 patients received combined-chemotherapy (Table 1).

### Nodal status distribution and node ratio categories

All the patients received extensive lymphadenectomy except two of them were resected lymph nodes less than 15 (MLR was 0.9 and 0.85). The median number of removed lymph nodes was 35 (range: 10 to 104) and the median number of metastatic lymph nodes was 8 (range: 0 to 71). In brief, patients were classified into metastatic lymph nodes ratio MLR0 to MLR3, based on the following intervals: MLR0: 0%; MLR1:  $\leq 10\%$ ; MLR2: 11%-25%; MLR3:  $>25\%$ . The median MLR was 24%.

MLR had a significant correlation with tumor differentiated degree and disease stage. MLR3 was found significantly more common in patients with G3 ( $p=0.033$ ) or with IIIC stage ( $p<0.001$ ). Meanwhile, each N category was stratified into different MLR subgroups. The results indicated a good consistency of the two classification methods: as the increase of N stage, MLR increased (Table 2).

### Survival analysis

After a median follow-up time of 31 months (range: 2 to 57 months), 50 patients (57.5%) succumb to the disease. The median DFS was 24.8 months and median (OS) was 31.7 months. The overall 3-year survival rate was 36.4%. OS of the MLR0 to MLR3 categories was 37.1m, 35.9m, 31.5m and 20.8m, respectively ( $p=0.013$ ) (Figure 1).

As shown in Table 2, factors including age, gender, tumor stage, tumor location, Borrmann type, depth of invasion, lymph node stage, disease stage and MLR were analyzed in univariate analysis. Disease stage, lymph node stage and MLR have significant impact on survival. In multivariate analysis, MLR has remained an independent prognostic factor of survival (Hazard ratio: 1.47, 95% CI: 1.014-2.120,  $P=0.042$ ).

We further analyzed the correlation of MLR with adjuvant chemotherapy. When stratifying patients into low MLR ( $MLR \leq 24\%$ ) or high MLR ( $>24\%$ ) subgroups, significant differences of survival were found between patients with adjuvant chemotherapy or not: OS of patients in low MLR group without chemotherapy was 36.5 months, OS of patients in low MLR group with chemotherapy was 39.3 months, OS of patients in high MLR group without chemotherapy was 12.2 months, and OS of patients in high MLR group with chemotherapy was 22.9 months, respectively ( $p=0.002$ ). (Figure 2).

## DISCUSSION

It has been confirmed that the category based on the number of metastatic lymph nodes is more sensitive

**Table 1: Clinical and pathological characteristics of 87 patients and univariate analysis**

| Variable              |                | No. of patient (%) | OS(months) | P value |
|-----------------------|----------------|--------------------|------------|---------|
| Age (years)           | ≤60            | 44 (50.6)          | 39.2       | 0.115   |
|                       | >60            | 43 (49.4)          | 28.6       |         |
| Gender                | Male           | 58 (66.7)          | 30.6       | 0.565   |
|                       | Female         | 29 (33.3)          | 31.8       |         |
| Differentiated degree | G1             | 3 (3.4)            | 32.2       | 0.214   |
|                       | G2             | 32 (36.8)          | 36.4       |         |
|                       | G3             | 52 (59.8)          | 29.5       |         |
| Tumor localization    | Cardias        | 15 (17.2)          | 30.6       | 0.079   |
|                       | Body/fundus    | 10 (11.5)          | 22.5       |         |
|                       | Antrum/pylorus | 35 (40.2)          | 36.4       |         |
|                       | Diffuse        | 27 (31.0)          | 17.2       |         |
| Borrmann type         | I              | 3 (3.4)            | 33.5       | 0.799   |
|                       | II             | 0 (0)              | -          |         |
|                       | III            | 62 (71.3)          | 31         |         |
|                       | IV             | 22 (25.3)          | 31.8       |         |
| Depth of invasion     | T1             | 0                  |            | 0.161   |
|                       | T2             | 2 (2.3)            | 22.8       |         |
|                       | T3             | 17 (19.5)          | 36.4       |         |
|                       | T4             | 68 (78.2)          | 29.5       |         |
| HER-2 IHC             | 0              | 34(39.1)           | 31         | 0.134   |
|                       | +              | 34(39.1)           | 27.9       |         |
|                       | ++             | 9(10.3)            | 22.5       |         |
|                       | +++            | 2(2.3)             | 36.5       |         |
|                       | unknown        | 8(9.2)             | 49         |         |
| Lymph node stage      | N0             | 5 (5.7)            | 37.1       | 0.012   |
|                       | N1             | 17 (19.5)          | 36.4       |         |
|                       | N2             | 16 (18.4)          | 30.6       |         |
|                       | N3a            | 26 (29.9)          | 31.8       |         |
|                       | N3b            | 23 (26.4)          | 19.7       |         |
| Disease stage         | IIIa           | 8 (9.2)            | 35.9       | 0.029   |
|                       | IIIb           | 20 (23.0)          | 39.2       |         |
|                       | IIIc           | 59 (67.8)          | 20.8       |         |
| MLR                   | MLR0           | 5(5.7)             | 37.1       | 0.013   |
|                       | MLR1           | 24(27.6)           | 35.9       |         |
|                       | MLR2           | 15(17.2)           | 31.5       |         |
|                       | MLR3           | 43(49.4)           | 20.8       |         |

**Table 2: The correlation between MLR and clinicopathological factors**

| Factor                |              | No. of patient | MLR      |           |           |           | Chi-square P-value |
|-----------------------|--------------|----------------|----------|-----------|-----------|-----------|--------------------|
|                       |              |                | 0        | 1         | 2         | 3         |                    |
| Differentiated degree | G1           | 3              | 1(33.3%) | 1(33.3%)  | 0(0%)     | 1(33.3)   | 0.033              |
|                       | G2           | 32             | 4(12.5%) | 11(34.4%) | 6(18.8%)  | 11(34.4%) |                    |
|                       | G3           | 52             | 0(0%)    | 12(23.1%) | 9(17.3%)  | 31(59.6%) |                    |
| Tumor stage           | T1-3         | 19             | 0(0%)    | 8(42.1%)  | 4(21.2%)  | 7(36.8%)  | 0.237              |
|                       | T4           | 68             | 5(7.4%)  | 16(23.5%) | 11(16.2%) | 36(52.9%) |                    |
| Tumor location        | Cardia       | 15             | 1(6.7%)  | 4(26.7%)  | 4(26.7%)  | 6(40%)    | 0.363              |
|                       | Body         | 10             | 2(20%)   | 0(0%)     | 2(20%)    | 6(60%)    |                    |
|                       | Antropyloric | 35             | 1(2.9%)  | 10(28.6%) | 6(17.1%)  | 18(51.4%) |                    |
|                       | Diffuse      | 27             | 1(3.7%)  | 10(37%)   | 3(11.1%)  | 13(48.1%) |                    |
| Borrmann type         | I            | 3              | 0(0%)    | 2(66.7%)  | 0(0%)     | 1(33.3%)  | 0.599              |
|                       | II           | 0              |          |           |           |           |                    |
|                       | III          | 62             | 3(48%)   | 16(25.8%) | 13(21%)   | 30(48.4%) |                    |
|                       | IV           | 22             | 2(9.1%)  | 6(27.3%)  | 2(9.1%)   | 12(54.5%) |                    |
| Disease stage         | IIIA         | 8              | 0(0%)    | 6(75%)    | 0(0%)     | 2(25%)    | <0.001             |
|                       | IIIB         | 20             | 5(25%)   | 14(70%)   | 1(5%)     | 0(0%)     |                    |
|                       | IIIC         | 59             | 0(0%)    | 4(6.8%)   | 14(23.7%) | 41(69.5%) |                    |
| N stage               | N0           | 5              | 5(100%)  | 0(0%)     | 0(0%)     | 0(0%)     | <0.001             |
|                       | N1           | 17             | 0(0%)    | 17(100%)  | 0(0%)     | 0(0%)     |                    |
|                       | N2           | 16             | 0(0%)    | 7(43.8%)  | 8(50%)    | 1(6.3%)   |                    |
|                       | N3a          | 26             | 0(0%)    | 0(0%)     | 7(26.9%)  | 19(73.1%) |                    |
|                       | N3b          | 23             | 0(0%)    | 0(0%)     | 0(0%)     | 23(100%)  |                    |

than that based on the location in prognostic evaluation of gastric cancer, especially when a minimum of 15 lymph nodes are examined in the surgical specimen [14]. Since 1997 the MLR has been showed to be a good alternative to prevent the stage migration phenomena and predict prognosis in a series of studies [8-13]. However, there was still no consensus about the cut-off limit for MLR in these studies. Many of these studies designed a 0.2 to 0.3 cut-off for MLR and reported patients with higher MLR had significantly lower survival rate. In our study, the appropriate MLR intervals were determined by the log-rank test. Consistent with these results, the high MLR was a poor prognostic factor for stage III gastric cancer patients and it remained as an independent factor according to the results of multivariate analysis. The median OS of MLR0 to MLR3 was 37.1m, 35.9m, 31.5m and 20.8m, respectively (p=0.013). It has seemed that a cut off level of 0.1 and 0.25 was suitable for categorizing MLR in stage III gastric cancer patients.

Two large phase III trials showed the benefit of adjuvant chemotherapy for gastric cancer, including stage III gastric cancer patients [15, 16]. Which patients benefit more? Could MLR be predictive factor of the efficacy of chemotherapy? There was no related study before. Our results showed MLR to be an appropriate factor to evaluate the benefit from adjuvant chemotherapy. For the patient with high MLR (MLR>0.24), median OS was significantly longer in the patients with adjuvant chemotherapy than without chemotherapy (22.9m vs 12.2m, p=0.002), which further indicated the additional value of MLR in helping screen the patients with high risk of recurrences or metastases who needed systemic therapy most.

A possible limitation of the present study might be the relative small number of patients analyzed. Thus, larger-scale study is needed to confirm the results. Furthermore, to illustrate the value of MLR in prognosis and stage, comparison of MLR and TNM stage system involving large-scale population is necessary.

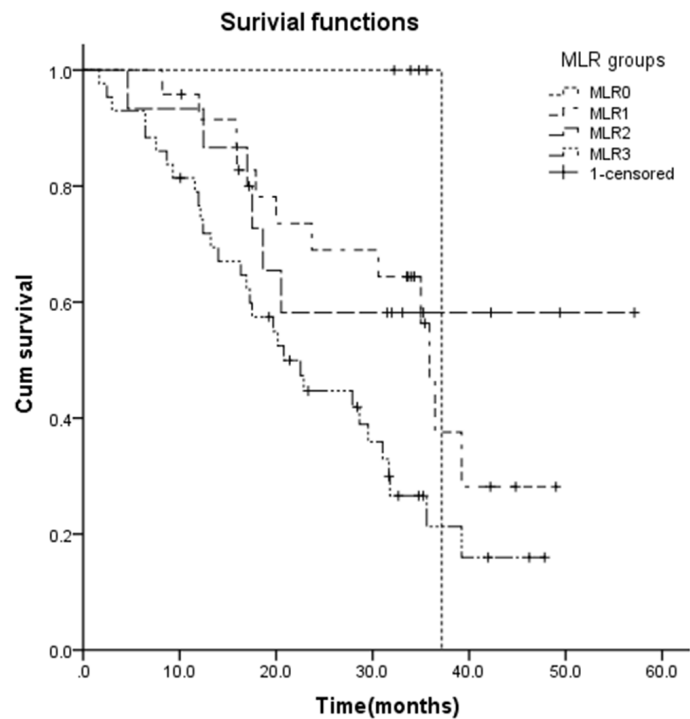

Figure 1: The overall survival in different MLR groups: OS of the MLR0 to MLR3 categories was 37.1m, 35.9m, 31.5m and 20.8m, respectively (p=0.013).

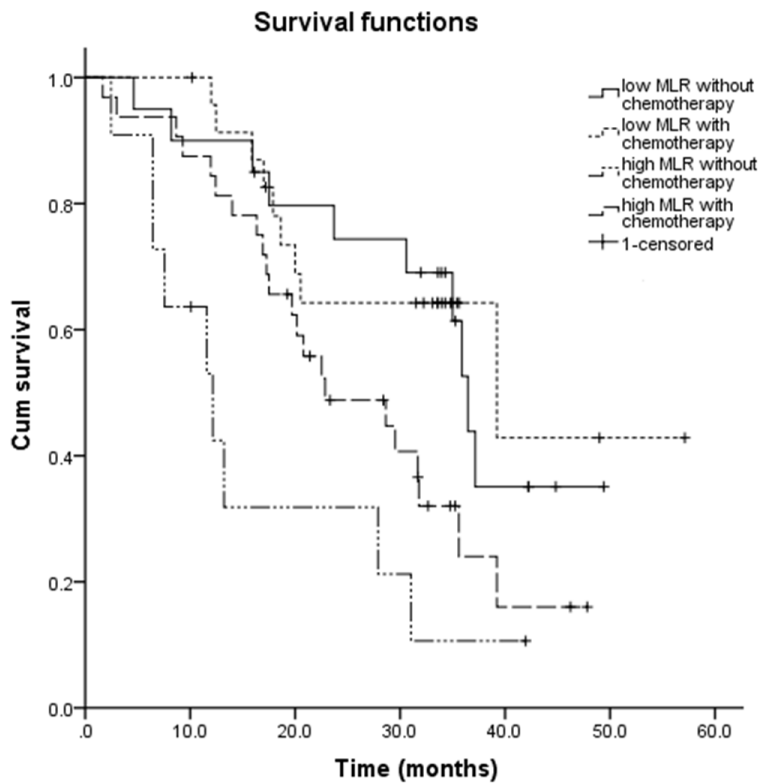

Figure 2: The correlation of MLR with adjuvant chemotherapy: OS of patients in low MLR group without chemotherapy was 36.5 months, OS of patients in low MLR group with chemotherapy was 39.3 months, OS of patients in high MLR group without chemotherapy was 12.2 months, and OS of patients in high MLR group with chemotherapy was 22.9 months, respectively (p=0.002).



In summary, the results of this study indicated that the MLR might act as a simple and effective indicator for prognostic factor for stage III gastric cancer after D2 nodal dissection. Furthermore, high MLR may benefit most from adjuvant chemotherapy.

## MATERIALS AND METHODS

This study enrolled 87 gastric cancer patients who underwent D2 lymphadenectomy at Zhejiang Cancer Hospital from December 2010 to March 2014. The pathology was gastric adenocarcinoma. The clinical and pathological information has been extracted. The records with ambiguous data were excluded.

Lymph node stage was classified according to the 2010 American Joint Committee on Cancer (AJCC) staging criteria for all patients. MLR was defined as number of metastatic lymph nodes divided by total resected lymph nodes. MLR intervals were determined using the log-rank test.

The follow-up of the patients was conducted with the following endpoints: disease-free survival (DFS, time from diagnosis to the first recurrence of the disease after the surgical treatment or death), and overall survival (OS, time from diagnosis to all causes of death).

Survival analysis and curves were established according to the Kaplan-Meier method and compared the log-rank test. Univariate and multivariate analyses were carried out by the Cox proportional hazards model. In all statistical analyses, a P value of <0.05 was considered significant. Data analysis was carried out with the Statistical Package for Social Sciences (SPSS) version 13.0.

## CONFLICTS OF INTEREST

The authors declare that they have no conflicts of interest.

## REFERENCES

1. Ferlay J, Soerjomataram I, Dikshit R, Eser S, Mathers C, Rebelo M, Parkin DM, Forman D, Bray F. Cancer incidence and mortality worldwide: sources, methods and major patterns in GLOBOCAN 2012. *Int J Cancer*. 2015; 136:E359-E386.
2. Harrison JD, Fielding JW. Prognostic factors for gastric cancer influencing clinical practice. *World J Surg*. 1995; 19:496-500.
3. Adachi Y, Shiraishi N, Suematsu T, Shiromizu A, Yamaguchi K, Kitano S. Most important lymph node information in gastric cancer: multivariate prognostic study. *Ann Surg Oncol*. 2000; 7:503-507.
4. Aurello P, D'Angelo F, Rossi S, Bellagamba R, Cicchini C, Nigri G, Ercolani G, De Angelis R, Ramacciato G. Classification of lymph node metastases from gastric cancer: comparison between N-site and N-number systems. Our experience and review of the literature. *Am Surg*. 2007; 73:359-366.
5. Yoon SS, Yang HK. Lymphadenectomy for gastric adenocarcinoma: should west meet east? *Oncologist*. 2009; 14:871-882.
6. Marchet A, Mocellin S, Ambrosi A, Morgagni P, Garcea D, Marrelli D, Roviello F, de Manzoni G, Minicozzi A, Natalini G, De Santis F, Baiocchi L, Coniglio A, et al. The ratio between metastatic and examined lymph nodes (N ratio) is an independent prognostic factor in gastric cancer regardless of the type of lymphadenectomy: results from an Italian multicentric study in 1853 patients. *Ann Surg*. 2007; 245:543-552.
7. Wang J, Dang P, Raut CP, Pandalai PK, Maduekwe UN, Rattner DW, Lauwers GY, Yoon SS. Comparison of a lymph node ratio-based staging system with the 7th AJCC system for gastric cancer: analysis of 18,043 patients from the SEER database. *Ann Surg*. 2012; 255:478-485.
8. Inoue K, Nakane Y, Iiyama H, Sato M, Kanbara T, Nakai K, Okumura S, Yamamichi K, Hioki K. The superiority of ratio-based lymph node staging in gastric carcinoma. *Ann Surg Oncol*. 2002; 9:27-34.
9. Chen S, Zhao BW, Li YF, Feng XY, Sun XW, Li W, Zhou ZW, Zhan YQ, Qian CN, Chen YB. The prognostic value of harvested lymph nodes and the metastatic lymph node ratio for gastric cancer patients: results of a study of 1,101 patients. *PLoS One*. 2012; 7:e49424.
10. Lee SR, Kim HO, Son BH, Shin JH, Yoo CH. Prognostic significance of the metastatic lymph node ratio in patients with gastric cancer. *World J Surg*. 2012; 36:1096-1101.
11. Alatengbaolide, Lin D, Li Y, Xu H, Chen J, Wang B, Liu C, Lu P. Lymph node ratio is an independent prognostic factor in gastric cancer after curative resection (R0) regardless of the examined number of lymph nodes. *Am J Clin Oncol*. 2013; 36:325-330.
12. Lorenzon L, Mercantini P, Ferri M, Ziparo V. Lymph-node ratio classification strongly correlates with cancer survivals of patients who underwent r0 resection for gastric cancer with more than 15 nodes harvested. *Eur Surg Res*. 2014; 53:1-10.
13. Kutlu OC, Watchell M, Dissanaik S. Metastatic lymph node ratio successfully predicts prognosis in western gastric cancer patients. *Surg Oncol*. 2015; 24:84-88.
14. Sasako M, Saka M, Fukagawa T, Katai H, Sano T. Surgical treatment of advanced gastric cancer: Japanese perspective. *Dig Surg*. 2007; 24:101-107.
15. Sasako M, Sakuramoto S, Katai H, Kinoshita T, Furukawa H, Yamaguchi T, Nashimoto A, Fujii M, Nakajima T, Ohashi Y. Five-year outcomes of a randomized phase III trial comparing adjuvant chemotherapy with S-1 versus surgery alone in stage II or III gastric cancer. *J Clin Oncol*. 2011; 29:4387-4393.
16. Bang YJ, Kim YW, Yang HK, Chung HC, Park YK, Lee KH, Lee KW, Kim YH, Noh SI, Cho JY, Mok YJ, Kim YH, Ji J, et al. Adjuvant capecitabine and oxaliplatin for gastric cancer after D2 gastrectomy (CLASSIC): a phase 3 open-label, randomised controlled trial. *Lancet*. 2012; 379:315-321.
